# Supplementary material for: Tobacco endgame in the WHO European Region: Feasibility in light of current tobacco control status
Source: PubMed Central journal article supplement (PMC10647070; doi:10.18332/tid/174360), 2023-11-15
Supplement: TID-21-151-s1.pdf [file TID-21-151-s1.pdf]

|                        | National key regulations |                            |               |                    |                       | Taxation and prices |                 |                       |                |                     |                           | Public awareness raising and communications | Cessation   |
|------------------------|--------------------------|----------------------------|---------------|--------------------|-----------------------|---------------------|-----------------|-----------------------|----------------|---------------------|---------------------------|---------------------------------------------|-------------|
|                        | smoking_bans_P           | adherence_smokefree_comp_P | health_warn_W | bans_advertising_E | compliance_bans_adv_E | share_taxes_R       | aff_cig_trend_R | aff_cig_trend_R_score | aff_cig_2000_R | aff_cig_2000_R_tert | aff_cig_2000_R_tert_score | antitobacco_mass_campaign_W                 | help_quit_O |
| Albania                | 5                        |                            | 4             | 5                  |                       | 4                   | Yes             | 1                     | 4.56%          | HIGH                | 1.00                      | 2                                           | 4           |
| Andorra                | 3                        | 7                          | 2             | 2                  |                       | 5                   |                 | 0                     | 1.00%          | LOW                 | 0.00                      | 2                                           | 4           |
| Armenia                | 4                        | 8                          | 5             | 4                  | 8                     | 3                   | No              | -1                    | 3.28%          | HIGH                | 1.00                      | 4                                           | 4           |
| Austria                | 3                        | 9                          | 5             | 4                  | 10                    | 4                   | Yes             | 1                     | 1.34%          | LOW                 | 0.00                      | 4                                           | 5           |
| Azerbaijan             | 3                        |                            | 3             | 5                  |                       | 3                   | No change       | 0                     | 2.57%          | MID                 | 0.50                      | 2                                           | 3           |
| Belarus                | 2                        | 6                          | 5             | 4                  | 8                     | 4                   | Yes             | 1                     | 0.88%          | LOW                 | 0.00                      | 5                                           | 4           |
| Belgium                | 2                        | 8                          | 5             | 4                  | 10                    | 5                   | Yes             | 1                     | 1.77%          | LOW                 | 0.00                      | 2                                           | 4           |
| Bosnia and Herzegovina | 2                        |                            | 2             | 4                  | 8                     | 5                   | Yes             | 1                     | 6.09%          | HIGH                | 1.00                      | 4                                           | 4           |
| Bulgaria               | 5                        | 5                          | 5             | 4                  | 8                     | 5                   | No              | -1                    | 2.97%          | HIGH                | 1.00                      | 2                                           | 4           |
| Croatia                | 4                        |                            | 5             | 4                  |                       | 5                   | No change       | 0                     | 2.75%          | MID                 | 0.50                      | 2                                           | 4           |
| Cyprus                 | 4                        | 7                          | 5             | 4                  | 10                    | 4                   | Yes             | 1                     | 1.96%          | LOW                 | 0.00                      | 4                                           | 4           |
| Czech Republic         | 3                        | 9                          | 5             | 4                  | 10                    | 5                   | Yes             | 1                     | 2.07%          | MID                 | 0.50                      | 4                                           | 5           |
| Denmark                | 2                        | 9                          | 5             | 4                  |                       | 5                   | No change       | 0                     | 1.59%          | LOW                 | 0.00                      | 4                                           | 5           |
| Estonia                | 2                        | 10                         | 5             | 4                  | 10                    | 5                   | No change       | 0                     | 1.99%          | LOW                 | 0.00                      | 5                                           | 4           |
| Finland                | 2                        | 10                         | 5             | 5                  | 10                    | 5                   | Yes             | 1                     | 2.04%          | MID                 | 0.50                      | 4                                           | 4           |
| France                 | 3                        | 8                          | 5             | 4                  | 10                    | 5                   | Yes             | 1                     | 2.91%          | MID                 | 0.50                      | 5                                           | 4           |
| Georgia                | 4                        | 8                          | 5             | 4                  | 8                     | 5                   | No change       | 0                     | 3.71%          | HIGH                | 1.00                      | 5                                           | 4           |
| Germany                | 2                        |                            | 5             | 4                  | 10                    | 4                   | Yes             | 1                     | 1.76%          | LOW                 | 0.00                      | 5                                           | 4           |
| Greece                 | 5                        |                            | 5             | 4                  |                       | 5                   | Yes             | 1                     | 2.93%          | MID                 | 0.50                      | 2                                           | 4           |
| Hungary                | 4                        |                            | 5             | 4                  |                       | 4                   | Yes             | 1                     | 3.20%          | HIGH                | 1.00                      | 2                                           | 4           |

|                     |   |    |   |   |    |   |           |    |        |      |      |   |   |
|---------------------|---|----|---|---|----|---|-----------|----|--------|------|------|---|---|
| Iceland             | 2 | 10 | 4 | 5 | 10 | 4 | No change | 0  | 1.86%  | LOW  | 0.00 | 2 | 3 |
| Ireland             | 5 | 10 | 5 | 4 | 10 | 5 | No        | -1 | 1.94%  | LOW  | 0.00 | 5 | 5 |
| Israel              | 3 |    | 4 | 2 |    | 5 | Yes       | 1  | 2.36%  | MID  | 0.50 | 2 | 4 |
| Italy               | 2 |    | 5 | 4 | 8  | 5 | Yes       | 1  | 2.20%  | MID  | 0.50 | 2 | 4 |
| Kazakhstan          | 4 |    | 5 | 4 | 8  | 4 | Yes       | 1  | 1.22%  | LOW  | 0.00 | 5 | 4 |
| Kyrgyzstan          | 3 | 3  | 5 | 4 | 7  | 4 | Yes       | 1  | 9.64%  | HIGH | 1.00 | 2 | 4 |
| Latvia              | 4 | 8  | 5 | 4 | 10 | 5 | No change | 0  | 2.45%  | MID  | 0.50 | 5 | 4 |
| Lithuania           | 3 | 3  | 5 | 4 | 10 | 4 | No change | 0  | 2.39%  | MID  | 0.50 | 2 | 4 |
| Luxembourg          | 3 |    | 5 | 4 |    | 4 | No change | 0  | 0.56%  | LOW  | 0.00 | 2 | 5 |
| Malta               | 5 |    | 5 | 4 |    | 5 | No        | -1 | 2.21%  | MID  | 0.50 | 2 | 4 |
| Monaco              | 2 |    | 2 | 2 |    | 1 |           | 0  |        |      | 0.00 | 5 | 4 |
| Montenegro          | 3 |    | 5 | 4 |    | 5 | Yes       | 1  | 3.31%  | HIGH | 1.00 | 2 | 2 |
| Netherlands         | 2 |    | 5 | 4 | 10 | 5 | Yes       | 1  | 1.78%  | LOW  | 0.00 | 2 | 5 |
| Norway              | 5 | 10 | 4 | 4 | 7  | 4 | Yes       | 1  | 2.02%  | LOW  | 0.00 | 5 | 4 |
| Poland              | 3 | 8  | 5 | 4 | 8  | 5 | No change | 0  | 2.75%  | MID  | 0.50 | 3 | 4 |
| Portugal            | 4 | 8  | 5 | 4 |    | 5 | No change | 0  | 2.33%  | MID  | 0.50 | 2 | 4 |
| Republic of Moldova | 3 |    | 5 | 5 | 8  | 4 | Yes       | 1  | 4.24%  | HIGH | 1.00 | 2 | 4 |
| Romania             | 5 | 7  | 5 | 4 | 9  | 4 | No change | 0  | 3.79%  | HIGH | 1.00 | 2 | 4 |
| Russian Federation  | 5 | 9  | 5 | 5 |    | 4 | Yes       | 1  | 2.22%  | MID  | 0.50 | 5 | 4 |
| San Marino          | 3 |    | 2 | 4 | 8  | 1 |           | 0  |        |      | 0.00 | 2 | 2 |
| Serbia              | 3 | 3  | 3 | 4 | 10 | 5 | Yes       | 1  | 3.55%  | HIGH | 1.00 | 2 | 4 |
| Slovakia            | 3 | 10 | 5 | 4 |    | 5 | Yes       | 1  | 2.14%  | MID  | 0.50 | 2 | 5 |
| Slovenia            | 3 |    | 5 | 5 | 8  | 5 | No change | 0  | 1.73%  | LOW  | 0.00 | 2 | 4 |
| Spain               | 5 | 8  | 5 | 5 | 10 | 5 | No change | 0  | 2.13%  | MID  | 0.50 | 4 | 4 |
| Sweden              | 2 |    | 5 | 4 |    | 4 | Yes       | 1  | 1.47%  | LOW  | 0.00 | 4 | 5 |
| Switzerland         | 2 |    | 4 | 2 | 10 | 4 | Yes       | 1  | 1.15%  | LOW  | 0.00 | 2 | 4 |
| Tajikistan          | 5 | 3  | 5 | 4 |    | 3 | No change | 0  | 10.44% | HIGH | 1.00 | 2 | 2 |

|                                           |   |    |   |   |    |   |           |   |        |      |      |   |   |
|-------------------------------------------|---|----|---|---|----|---|-----------|---|--------|------|------|---|---|
| The former Yugoslav Republic of Macedonia | 5 |    | 4 | 4 | 10 | 5 | No change | 0 | 2.93%  | MID  | 0.50 | 2 | 4 |
| Turkey                                    | 5 | 7  | 5 | 5 | 8  | 5 | No change | 0 | 3.47%  | HIGH | 1.00 | 5 | 5 |
| Turkmenistan                              | 5 | 9  | 5 | 4 | 10 | 3 | Yes       | 1 | 10.62% | HIGH | 1.00 | 5 | 4 |
| Ukraine                                   | 4 | 8  | 5 | 4 | 9  | 4 | Yes       | 1 | 4.40%  | HIGH | 1.00 | 5 | 3 |
| United Kingdom                            | 5 | 10 | 5 | 4 | 10 | 5 | Yes       | 1 | 3.36%  | HIGH | 1.00 | 5 | 4 |
| Uzbekistan                                | 2 |    | 3 | 4 |    | 4 | No change | 0 | 4.82%  | HIGH | 1.00 | 2 | 4 |

© 2023 González-Marrón A. et al.
